# Supplementary material for: Caregivers’ Malaria Knowledge, Beliefs and Attitudes, and Related Factors in the Bata District, Equatorial Guinea
Source: PubMed Central journal article supplement (PMC5201263; doi:10.1371/journal.pone.0168668), 2016-12-30
Supplement: pone.0168668.s003.pdf [file pone.0168668.s003.pdf]

**C. KNOWLEDGE, BELIEFS AND ATTITUDES.**

**Now we are going to talk about what you know and belief. Please, it is very important that you answer sincerely. There are no wrong answers; all your answers are good.**

C.1. What is the principal health problem in your community?

1. Malaria
2. HIV/AIDS
3. Fever
4. Convulsions
5. Respiratory Infections
6. Diarrhoea
7. Measels
98. Other \_\_\_\_\_
99. DK

C.2 Have you ever heard about malaria?

1. Yes
2. No
99. DK

C.3. Do you know any malaria symptom? (More than one answer is possible)

1. Fever
2. Convulsions
3. Body pain
4. Nausea
5. Headache
6. Weakness
98. Other \_\_\_\_\_
99. DK

C.4. How is malaria transmitted?

1. Mosquito bite
2. Dirtiness
3. Drinking water
4. Food
5. Walk barefoot
98. Other \_\_\_\_\_
99. DK

C.9. Who does suffer most frequently from malaria?

1. Children

2. Adults
3. Young
4. Children and young
5. Women
98. Other \_\_\_\_\_
99. DK

C.10. Who do you think malaria is more dangerous for?

1. Children
2. Adults
3. Young
4. Children and young
5. Women
98. Other \_\_\_\_\_
99. DK

C.11. Do you think malaria could be lethal?

1. Yes
2. No
99. DK

C.12. What are the main malaria symptoms in children? (More than one answer is possible)

1. Fever
2. Convulsions
3. Body pain
4. Nausea
5. Headache
6. Weakness
98. Other \_\_\_\_\_
99. DK

C.13. Do you know if malaria is preventable?

1. Yes
2. No (Go to C15)
99. Dk (Go to C15)

C.14. What is the best way to prevent malaria? (More than one answer is possible)

1. Indoor spraying
2. Generating smoke
3. Sleeping under a bed net
4. Cleaning the house and environs
5. Draining/covering stagnant water

6. Taking preventive medication

98. Other \_\_\_\_\_

99. DK

C.15. And what is the best treatment for malaria? (More than one answer is possible)

1. Fansidar

2. Coartem

3. Chloroquine

4. Paracetamol

5. Amoxicillin

6. Quinine

7. Artemether

8. AS/AQ

9. Traditional medicine

98. Other \_\_\_\_\_

99. DK

C.16. Do you know the breeding site of mosquitoes?

1. Puddles

2. Grass

3. Dark places

4. Stagnant water

5. Garbages

98. Other \_\_\_\_\_

99. DN

C.17. What is the biting time of mosquitoes that transmit malaria?

1. Dusk

2. Morning

3. Evening

4. Dawn

5. Night

98. Other \_\_\_\_\_

99. DN

C.18. What is the best way to avoid a mosquito bite?

1. Use mosquito coil

2. Indoor spraying

3. Generate smoke

4. Sleep under a bed net

5. Clean the house and environs

6. Nets in the windows

98. Other \_\_\_\_\_

99. DN

C.19. If a child has malaria, where is the best place to seek treatment?

1. Pharmacy

2. Traditional healer

3. Private doctor

4. Health Center

5. Hospital

98. Other \_\_\_\_\_

99. DK

C.20. What is the best treatment for a child with malaria?

1. Fansidar

2. Coartem

3. Chloroquine

4. Paracetamol

5. Amoxicillin

6. Quinine

7. Artemether

8. AS/AQ

9. Traditional medicine

98. Other \_\_\_\_\_

99. DK

C.21 Have you ever received any advice related to malaria?

1. Yes (Go to 22)

2. No

99. DK

C.22. Where or from who have you received this advice?

1. Mother

2. Radio

3. Hospital

4. Health Center

98. Other \_\_\_\_\_

99. DK
